# Supplementary material for: La2O3 nanoparticle/polyacrylonitrile nanofibers for bacterial inactivation based on phosphate control
Source: Royal Society of Chemistry journal article supplement (doi:10.1039/c6ra22374e), 2016-01-01
Supplement: c6ra22374e1.pdf [file c6ra22374e1.pdf]

# Supporting Information

## La<sub>2</sub>O<sub>3</sub> nanoparticles/ polyacrylonitrile nanofibers for bacterial inactivation based on phosphate control

Jiaojie He, Wei Wang\*, Wenxin Shi, Fuyi Cui

*†State Key Laboratory of Urban Water Resource and Environment (SKLUWRE),  
School of Municipal and Environmental Engineering, Harbin Institute of Technology,  
Harbin 150090, P.R. China*

Table S1 EDX patterns of the selected part in Fig. 1c for the elements.

Table S2 Constant of Langmuir and Freundlich for phosphate adsorption under 25 °C.

Table S3 The pseudo-first-order and pseudo-second-order model constants and correlation coefficient in the phosphate solution of different initial concentrations (20 mg P/L, 50 mg P/L and 80 mg P/L).

Figure S1. XRD spectra of LPNFs and La<sub>2</sub>O<sub>3</sub> nanoparticles.

Figure S2. (a) Effect of initial pH of LPNFs on phosphate adsorption and the final pH drift of solution. (b) Effect of competitive coexisting anions on the phosphate adsorption capacity.

Table S1

| Element | Weight | Atomic % |
|---------|--------|----------|
| O       | 17.70  | 65.12    |
| La      | 82.30  | 34.88    |

Table S2

| Samples | Langmuir                     |                       |                | Freundlich |                |                |
|---------|------------------------------|-----------------------|----------------|------------|----------------|----------------|
|         | q <sub>m</sub> (mg P/g (La)) | K <sub>L</sub> (L/mg) | R <sup>2</sup> | n          | K <sub>F</sub> | R <sup>2</sup> |

|                                               |       |      |      |      |       |      |
|-----------------------------------------------|-------|------|------|------|-------|------|
| PAN/La <sub>2</sub> O <sub>3</sub> Nanofibers | 77.46 | 0.14 | 0.92 | 3.61 | 23.67 | 0.90 |
|-----------------------------------------------|-------|------|------|------|-------|------|

1

2 Table S3

| Initial<br>concentration<br>$C_0$ (mg<br>P/g) | Pseudo-first-order kinetics |                                |       | Pseudo-second-order kinetics                    |                                 |       |
|-----------------------------------------------|-----------------------------|--------------------------------|-------|-------------------------------------------------|---------------------------------|-------|
|                                               | $k_1$<br>(1/min)            | $q_e$ (cal)<br>(mg<br>P/g(La)) | $R^2$ | $k_2$ (g • mg <sup>-1</sup> min <sup>-1</sup> ) | $q_e$ (cal)<br>(mg P/g<br>(La)) | $R^2$ |
| 80                                            | 0.019                       | 64.06                          | 0.98  | 0.0003                                          | 71.40                           | 0.99  |
| 50                                            | 0.012                       | 54.21                          | 0.97  | 0.0003                                          | 61.54                           | 0.97  |
| 20                                            | 0.018                       | 41.48                          | 0.93  | 0.0006                                          | 45.06                           | 0.98  |

3

4 Figure S1.

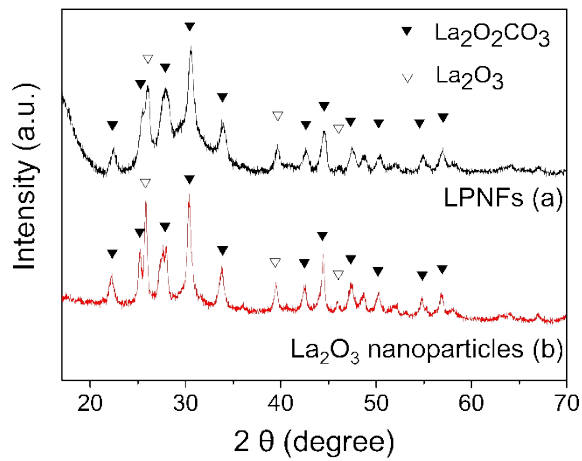

5

6

7 Figure S2.

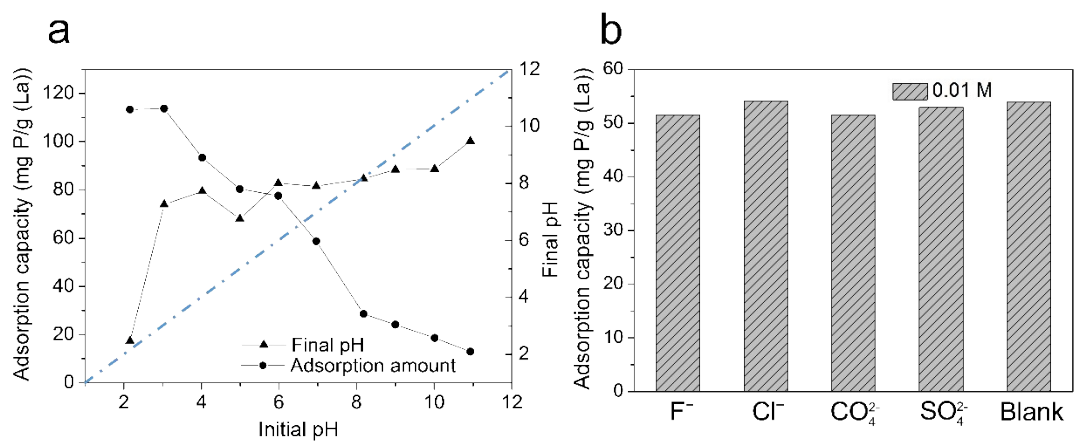

8
